# Supplementary material
Source: publisher site journal article supplement (http://www.kjim.org/upload/media/kjim-2019-053-suppl2.pdf)
Supplement: Supplementary file 1 [file kjim-2019-053-suppl2.pdf]

**Supplementary Table 2. Demographics and clinical characteristics of patients with proximal and distal colon cancer at baseline**

| Variable                          | Proximal colon cancer (n = 109) | Distal colon cancer (n = 184) | p value            |
|-----------------------------------|---------------------------------|-------------------------------|--------------------|
| Male sex                          | 56 (51.4)                       | 123 (66.8)                    | 0.009 <sup>a</sup> |
| Age, ≥ 65 yr                      | 56 (51.4)                       | 99 (53.8)                     | 0.687              |
| BMI, ≥ 25 kg/m <sup>2</sup>       | 32 (29.4)                       | 78 (42.4)                     | 0.026 <sup>a</sup> |
| Diabetes                          | 14 (12.8)                       | 32 (17.4)                     | 0.301              |
| Hypertension                      | 39 (35.8)                       | 70 (38.0)                     | 0.698              |
| Current alcohol drinking          | 23 (21.1)                       | 59 (32.1)                     | 0.043 <sup>a</sup> |
| Current smoking                   | 19 (17.4)                       | 52 (28.3)                     | 0.037 <sup>a</sup> |
| T stage, T <sub>3-4</sub>         | 84 (77.1)                       | 125 (67.9)                    | 0.095              |
| N stage, N <sub>1-2</sub>         | 48 (44.0)                       | 74 (40.2)                     | 0.522              |
| Advanced stage, stage 3           | 46 (42.2)                       | 62 (33.7)                     | 0.145              |
| Differentiation, undifferentiated | 25 (22.9)                       | 13 (7.1)                      | < 0.001            |

Values are presented as number (%).

BMI, body mass index.

<sup>a</sup>Statistical significance.
